# Supplementary material for: Ganoderma lucidum polysaccharide ameliorated diabetes mellitus-induced erectile dysfunction in rats by regulating fibrosis and the NOS/ERK/JNK pathway
Source: PubMed Central journal article supplement — Transl Androl Urol. 2022 Jul;11(7):982–95. doi: 10.21037/tau-22-428 (PMC9360518; doi:10.21037/tau-22-428), 2022-07
Supplement: tau-11-07-982-dss.pdf [file tau-11-07-982-dss.pdf]

## Data Sharing Statement

|                     |                                                                                                                                                     |                                                                                                                                                                                    |
|---------------------|-----------------------------------------------------------------------------------------------------------------------------------------------------|------------------------------------------------------------------------------------------------------------------------------------------------------------------------------------|
| <b>Article Info</b> | <a href="https://dx.doi.org/10.21037/tau-22-428">https://dx.doi.org/10.21037/tau-22-428</a>                                                         |                                                                                                                                                                                    |
| <b>Item</b>         | <b>Question</b>                                                                                                                                     | <b>Authors' Response<br/>(place "-" if not applicable)</b>                                                                                                                         |
| 1                   | Would you like to share data collected for your study to others?                                                                                    | Yes                                                                                                                                                                                |
| 2                   | If not, would you like to share the reason for your decision?                                                                                       | -                                                                                                                                                                                  |
| 3                   | What data in particular will be shared?                                                                                                             | The data related to ERK1/2, eNOS, JNK phosphorylation and arginase II protein expression in particular will be shared, which is related to the mechanism of GLP in improving DMED. |
| 4                   | Any other documents will be shared? Such as study protocol, statistical analysis plan, informed consent form, clinical study report, analytic code. | Study protocol and statistical analysis plan will also be shared if requested.                                                                                                     |
| 5                   | When will data availability begin?                                                                                                                  | From the publication date.                                                                                                                                                         |
| 6                   | When will data availability end?                                                                                                                    | Two years within the publication date, since the technique may be update over time.                                                                                                |
| 7                   | To whom will you share the data?                                                                                                                    | Urologic surgeons who are interested in studies of DMED.                                                                                                                           |
| 8                   | For what type of analysis or purpose?                                                                                                               | For analysis to evaluate the safety of GLP in DMED.                                                                                                                                |
| 9                   | How or where can the data/documents be obtained?                                                                                                    | Emails could be sent to the address below to obtain the shared data: yaoxiaolin@zju.edu.cn.                                                                                        |
| 10                  | Any other restrictions?                                                                                                                             | We may balance the potential benefits and risks for each request and then provide the data that could be shared.                                                                   |
